# Supplementary material for: A novel palladium-catalyzed coupling of epoxides with allyl bromide mediated by indium(i) chloride: a cascade epoxide rearrangement–carbonyl allylation
Source: Royal Society of Chemistry journal article supplement (doi:10.1039/b305161g), 2003-01-01
Supplement: b305161g.doc [file b305161g.doc]

**A Novel Palladium-Catalyzed Coupling Reaction of Epoxides with Allyl Bromide Mediated by Indium(I) Chloride**

# **Nan Jiang,1 Qingyuan Hu,2 Carolyn S. Reid,1 Yunfeng Lu2* and Chao-Jun Li1***

# **Supporting information**

Experiment section

**General.** All reagents were purchased from Aldrich and used without further purification, and three epoxides were synthesized according to the literature1. All reactions were carried out under an air atmosphere at room temperature. All 1H NMR and 13H NMR spectra were measured in CDCl3 on a Varian Unity Inova 400; IR spectra were measured on a 670 Avatar FT-IR; GC/MS data were obtained by HP 5890 Series II Gas Chromatography & HP5989A Mass Spectrometer. Flash chromatography employed Kiesegel 60, 230-400 mesh purchased from Sorbent Technologies.

**Typical procedure for expoxidation:**

To a 25-mL flask were added sodium bicarbonate (0.355 g, 4.23 mmol), water (4 mL), acetone (2 mL), ethyl acetate (4 mL), and alkene (0.8 mmol) and were stirred vigorously. An aqueous Oxone solution (Oxone 0.520 g, 0.85 mmol, water 2 mL) was added dropwise over 10 min at 20 to 25
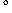
C. The reaction mixture was stirred for an additional 1 h. The organic layer was separated and washed with 20% (w/v) aqueous sodium chloride (10 mL) and then evaporated. The residue was purified by silica gel chromatograpy (*n*-hexane:ethyl acetate = 20:1-15:1) to give epoxide **1**.

**(3-Chlorophenyl)oxirane (1d)**, **Registry Number:** 20697-04-5

1H NMR (400MHz, CDCl3) δ 2.73 (dd, J = 5.6, 2.8 Hz, 1H), 3.11 (dd, J = 5.6, 4.4 Hz, 1H), 3.80 (dd, J = 4.0, 2.4 Hz, 1H), 7.15 (m, 1H), 7.23-7.25 (m, 3H); 13C NMR (100MHz, CDCl3) δ 51.18, 51.60, 123.66, 125.40, 128.22, 129.72, 134.47, 139.77.

**1, 2, 3, 4-Tetrahydronaphthalene-1, 2-oxide (1f)**, **Registry Number:** 2461-34-9

1H NMR (400MHz, CDCl3) δ 1.76 (m, 1H), 2.42 (m, 1H), 2.56 (dd, J = 15.6, 5.6 Hz, 1H), 2.81 (m, 1H), 3.74 (t, 1H), 3.86 (d, J = 4.4 Hz, 1H), 7.11 (q, 1H), 7.21-7.30 (m, 2H), 7.41 (q, 1H); 13C NMR (100MHz, CDCl3) δ 21.58, 24.18, 52.51, 54.86, 125.90, 128.17, 128.22, 129.33, 132.35, 136.45.

**Indene-1, 2-oxide (1g)**, **Registry Number:** 768-22-9

1H NMR (400MHz, CDCl3) δ, 2.98 (dd, J = 18.0, 2.8 Hz, 1H), 3.22 (d, J = 18.0 Hz, 1H), 4.13 (t, 1H), 4.27 (d, J = 2.8 Hz, 1H), 7.18-7.29 (m, 3H), 7.51 (d, J = 7.2 Hz, 1H); 13C NMR (100MHz, CDCl3) δ 34.44, 57.53, 58.96, 125.03, 125.93, 126.07, 128.39, 140.69, 143.38.

**Typical procedure for the coupling reaction:**

To a solution of epoxides (0.5 mmol) and allyl bromide (121 mg, 0.1 mmol) in 2 mL THF were added InCl (155 mg, 0.55 mmol) and palladium catalyst. The reaction mixture was capped and stirred at ambient temperature for 12 h or 24 h, and the solvent was removed *in vacuo*. The crude product was purified by flash chromatography (*n*-hexane : ethyl acetate = 10 : 1-5 : 1) to give the homoallylic alcohol **2**.

1**-Phenylpent-4-en-2-ol (2a)**, **Registry Number:** 61077-65-4

1H NMR (400MHz, CDCl3) δ 1.83 (s, 1H), 2.20-2.26 (m, 1H), 2.30-2.35 (m, 1H), 2.72 (dd, J = 13.6, 8.0 Hz, 1H), 2.81 (dd, J = 14.0, 5.2 Hz, 1H), 3.87 (m, 2H), 5.13-5.18 (m, 2H), 5.86 (m, 1H), 7.21-7.26 (m, 3H), 7.29-7.34 (m, 2H); 13C NMR (100MHz, CDCl3) δ 41.09, 43.19, 71.61, 118.04, 126.39, 128.45, 129.36, 134.64, 138.33; IR (neat) cm-1 3387, 2925, 1606, 1495, 1455, 1072, 1032, 901, 749, 684.

1**-Phenyl-1, 2-dideuterio-pent-4-en-2-ol (2a-1, 2-d2)**

1H NMR (400MHz, CDCl3) δ 1.70 (s, 1H), 2.11 (dd, J = 14.0, 7.6 Hz, 1H), 2.32 (dd, J = 14.0, 7.6 Hz 1H), 2.72 (dd, J = 14.0, 6.4 Hz, 1H), 2.74 (d, J = 34.4 Hz, 1H), 5.12-5.18 (m, 2H), 5.84 (m, 1H), 7.21-7.26 (m, 3H), 7.29-7.34 (m, 2H); 13C NMR (100MHz, CDCl3) δ 41.31, 43.08 (t, J = 190 Hz), 71.45 (t, J = 221 Hz), 118.46, 126.77, 128.83, 129.70, 134.95, 138.62

1**-(4-Bromophenyl)pent-4-en-2-ol (2b)**

1H NMR (400MHz, CDCl3) δ 1.70 (s, 1H), 2.16-2.22 (m, 1H), 2.28-2.33 (m, 1H), 2.68 (dd, J = 14.0, 7.6 Hz, 1H), 2.75 (dd, J = 14.0, 5.2 Hz, 1H), 3.83 (m, 2H), 5.12-5.17 (m, 2H), 5.82 (m, 1H), 7.09 (d, J = 8.4 Hz, 2H), 7.41 (d, J = 8.4 Hz, 2H); 13C NMR (100MHz, CDCl3) δ 41.20, 42.50, 71.32, 118.49, 120.29, 131.13, 131.49, 134.34, 137.39; IR (neat) cm-1 3387, 2919, 1481, 1389, 1073, 1013, 909, 791; MS *m/z* (%) 240(M+, 9), 199(18), 170(68), 120(40), 91(100), 71(48).

1**-(4-Fluorophenyl)pent-4-en-2-ol (2c)**

1H NMR (400MHz, CDCl3) δ 1.76 (s, 1H), 2.16-2.22 (m, 1H), 2.28-2.33 (m, 1H), 2.68 (dd, J = 14.0, 8.0 Hz, 1H), 2.76 (dd, J = 14.0, 4.8 Hz, 1H), 3.82 (m, 2H), 5.12-5.16 (m, 2H), 5.83 (m, 1H), 6.98 (m, 2H), 7.16 (m, 2H); 13C NMR (100MHz, CDCl3) δ 41.12, 42.27, 71.52, 115.11, 115.32, 118.32, 130.72, 130.80, 134.00, 134.04, 134.46, 160.37, 162.81; IR (liquid film) cm-1 3387, 2932, 1600, 1508, 1211, 1152, 914, 815; MS *m/z* (%) 180(M+, 9), 139(18), 121(20), 110(100), 91(11), 71(19).

1**-(3-Chlorophenyl)pent-4-en-2-ol (2d)**

1H NMR (400MHz, CDCl3) δ 1.77 (s, 1H), 2.15-2.22 (m, 1H), 2.20-2.34 (m, 1H), 2.68 (dd, J = 13.6, 8.0 Hz, 1H), 2.77 (dd, J = 13.6, 4.8 Hz, 1H), 3.85 (m, 2H), 5.12-5.17 (m, 2H), 5.83 (m, 1H), 7.08-7.10 (m, 1H), 7.18-7.22 (m, 3H); 13C NMR (100MHz, CDCl3) δ 41.22, 42.76, 71.32, 118.50, 126.60, 127.59, 129.45, 129.66, 134.17, 134.31, 140.52; IR (neat) cm-1 3446, 2905, 1593, 1444, 1363, 1211, 1073, 908, 782, 677; MS *m/z* (%) 196(M+, 6), 155(45), 126(100), 91(92), 71(30).

2**-Phenylhex-5-en-3-ol (2e)**, **Registry Number:** 77383-06-3

1H NMR (400MHz, CDCl3) δ 1.34 (d, J = 6.8 Hz, 3H), 1.72 (s, 1H), 1.98-2.06 (m, 1H), 2.13-2.22 (m, 1H), 2.74-2.82 (m, 1H), 3.68-3.73 (m, 1H), 5.06-5.15 (m, 2H), 5.79 (m, 1H), 7.19-7.33 (m, 5H); 13C NMR (100MHz, CDCl3) δ 16.63, 39.74, 45.60, 75.23, 118.39, 126.70, 128.02, 128.72, 135.32, 144.62; IR (neat) cm-1 3400, 2971, 1501, 1435, 1096, 974, 901, 762, 697.

**1, 2, 3, 4-Tetrahydro-2-(2-propenyl)naphthalen-2-ol (2f)**, **Registry Number:** 163807-56-5

1H NMR (400MHz, CDCl3) δ 1.77-1.89 (m, 3H), 2.20-2.26 (m, 1H), 2.34 (m, 2H), 2.75-2.89 (m, 3H), 3.00 (m, 1H), 5.15-5.23 (m, 2H), 5.98 (m, 1H), 7.07 (m, 1H), 7.13 (m, 3H); 13C NMR (100MHz, CDCl3) δ 26.02, 33.59, 41.66, 45.53, 70.34, 119.15, 125.79, 125.88, 128.62, 129.56, 133.27, 134.29, 135.36; IR (neat) cm-1 3387, 2925, 1495, 1455, 1073, 1033, 908, 749, 698.

**2, 3-Dihydro-2-(2-propenyl)inden-2-ol (2g)**, **Registry Number:** 389614-43-1

1H NMR (400MHz, CDCl3) δ 2.09 (s, 1H), 2.50 (d, J = 7.2 Hz, 2H), 2.93 (d, J = 16.0 Hz 1H), 3.08 (d, J = 16.0 Hz 1H), 3.87 (m, 2H), 5.18-5.22 (m, 2H), 5.97 (m, 1H), 7.16-7.22 (m, 4H); 13C NMR (100MHz, CDCl3) δ 44.89, 46.32, 81.37, 118.88, 124.88, 126.50, 133.92, 141.10; IR (neat) cm-1 3400, 2925, 1495, 1231, 1086, 964, 908, 736.

**1-Allyl-cyclohexanol (2h)**, **Registry Number:** 1123-34-8

1H NMR (400MHz, CDCl3) δ 1.36-1.64 (m, 11H), 2.18 (m, 2H), 5.05-5.12 (m, 2H), 5.85 (m, 1H); 13C NMR (100MHz, CDCl3) δ 22.10, 25.68, 46.60, 70.90, 118.61, 133.68; IR (neat) cm-1 3387, 2912, 1495, 736.

**Reference:**

[1] N. Hashimoto and A. Kanda, *Organic Process Research & Development* **2002**, *6*, 405
